# Supplementary material for: Sterically hindered selenoether ligands: palladium(ii) complexes as catalytic activators for Suzuki–Miyaura coupling
Source: Royal Society of Chemistry journal article supplement (doi:10.1039/c4ra06313a), 2014-08-28
Supplement: c4ra06313a1.pdf [file c4ra06313a1.pdf]

*Supporting information for*

**Sterically hindered selenoether ligands: palladium(II) complexes as catalytic activators for Suzuki-Miyaura coupling**

Umesh Kumar, Pooja Dubey, Ved Vati Singh, Om Prakash and Ajai K. Singh\*  
*Department of Chemistry, Indian Institute of Technology Delhi, Delhi – 110 016, India.*

---

| S.N. |                                                                           | Page No. |
|------|---------------------------------------------------------------------------|----------|
| S1   | <sup>1</sup> H NMR (300.13 MHz) spectrum of <b>L1</b> .                   | S2       |
| S2   | <sup>13</sup> C{ <sup>1</sup> H} NMR (75.47 MHz) spectrum of <b>L1</b> .  | S3       |
| S3   | <sup>77</sup> Se{ <sup>1</sup> H} NMR (57.24 MHz) spectrum of <b>L1</b> . | S4       |
| S4   | <sup>1</sup> H NMR (300.13 MHz) spectrum of <b>L2</b> .                   | S5       |
| S5   | <sup>13</sup> C{ <sup>1</sup> H} NMR (75.47 MHz) spectrum of <b>L2</b> .  | S6       |
| S6   | <sup>77</sup> Se{ <sup>1</sup> H} NMR (57.24 MHz) spectrum of <b>L2</b> . | S7       |
| S7   | <sup>1</sup> H NMR (300.13 MHz) spectrum of <b>1</b> .                    | S8       |
| S8   | <sup>13</sup> C{ <sup>1</sup> H} NMR (75.47 MHz) spectrum of <b>1</b> .   | S9       |
| S9   | <sup>77</sup> Se{ <sup>1</sup> H} NMR (57.24 MHz) spectrum of <b>1</b> .  | S10      |
| S10  | <sup>1</sup> H NMR (300.13 MHz) spectrum of <b>2</b> .                    | S11      |
| S11  | <sup>13</sup> C{ <sup>1</sup> H} NMR (75.47 MHz) spectrum of <b>2</b> .   | S12      |
| S12  | <sup>77</sup> Se{ <sup>1</sup> H} NMR (57.24 MHz) spectrum of <b>2</b> .  | S13      |

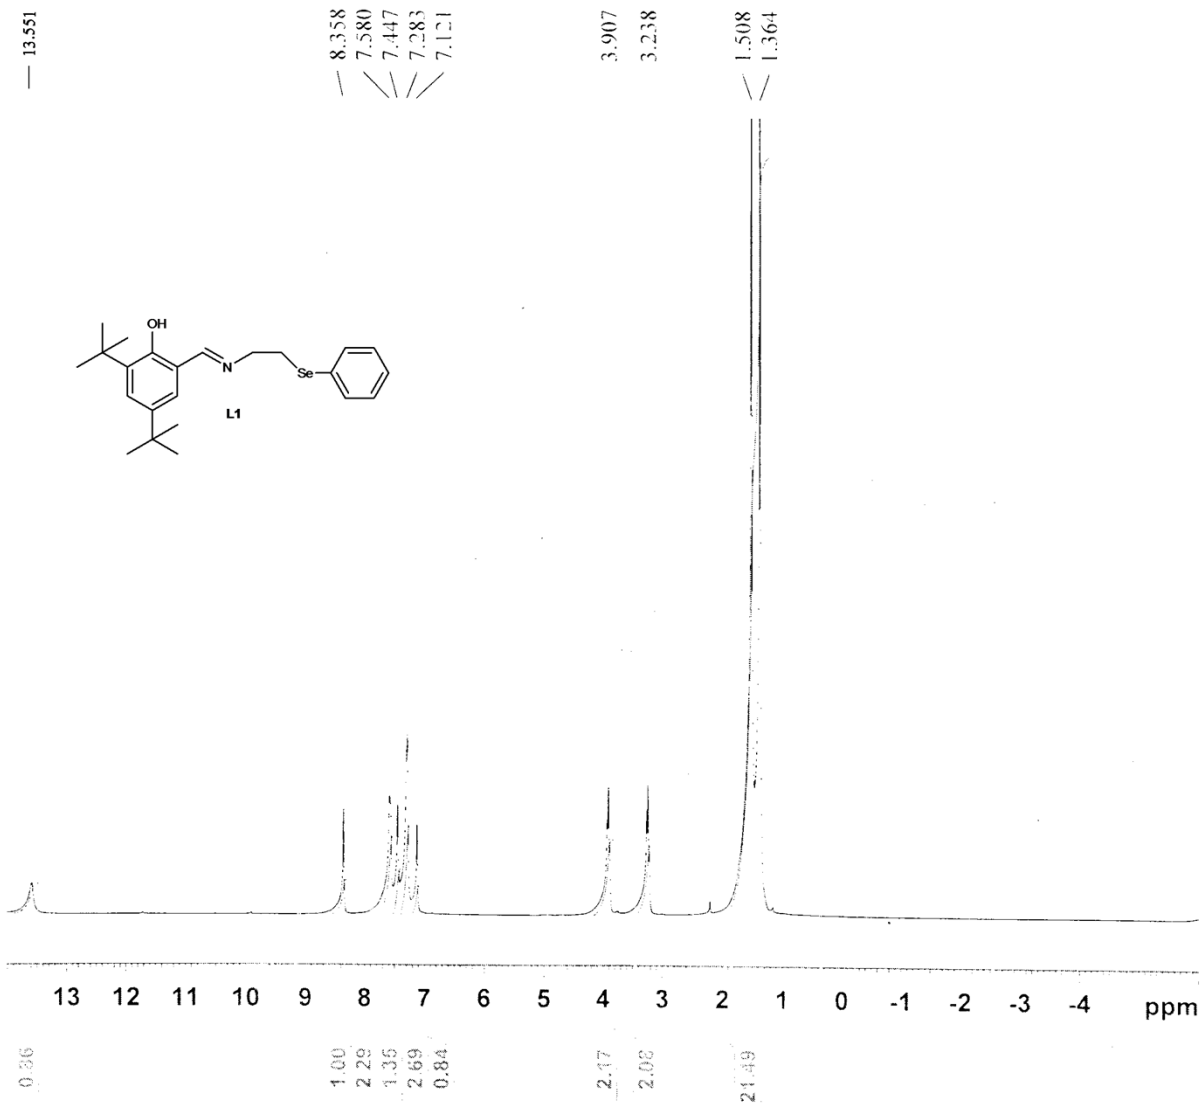

**Fig. S1**  $^1\text{H}$  NMR (300.13 MHz) spectrum of L1.

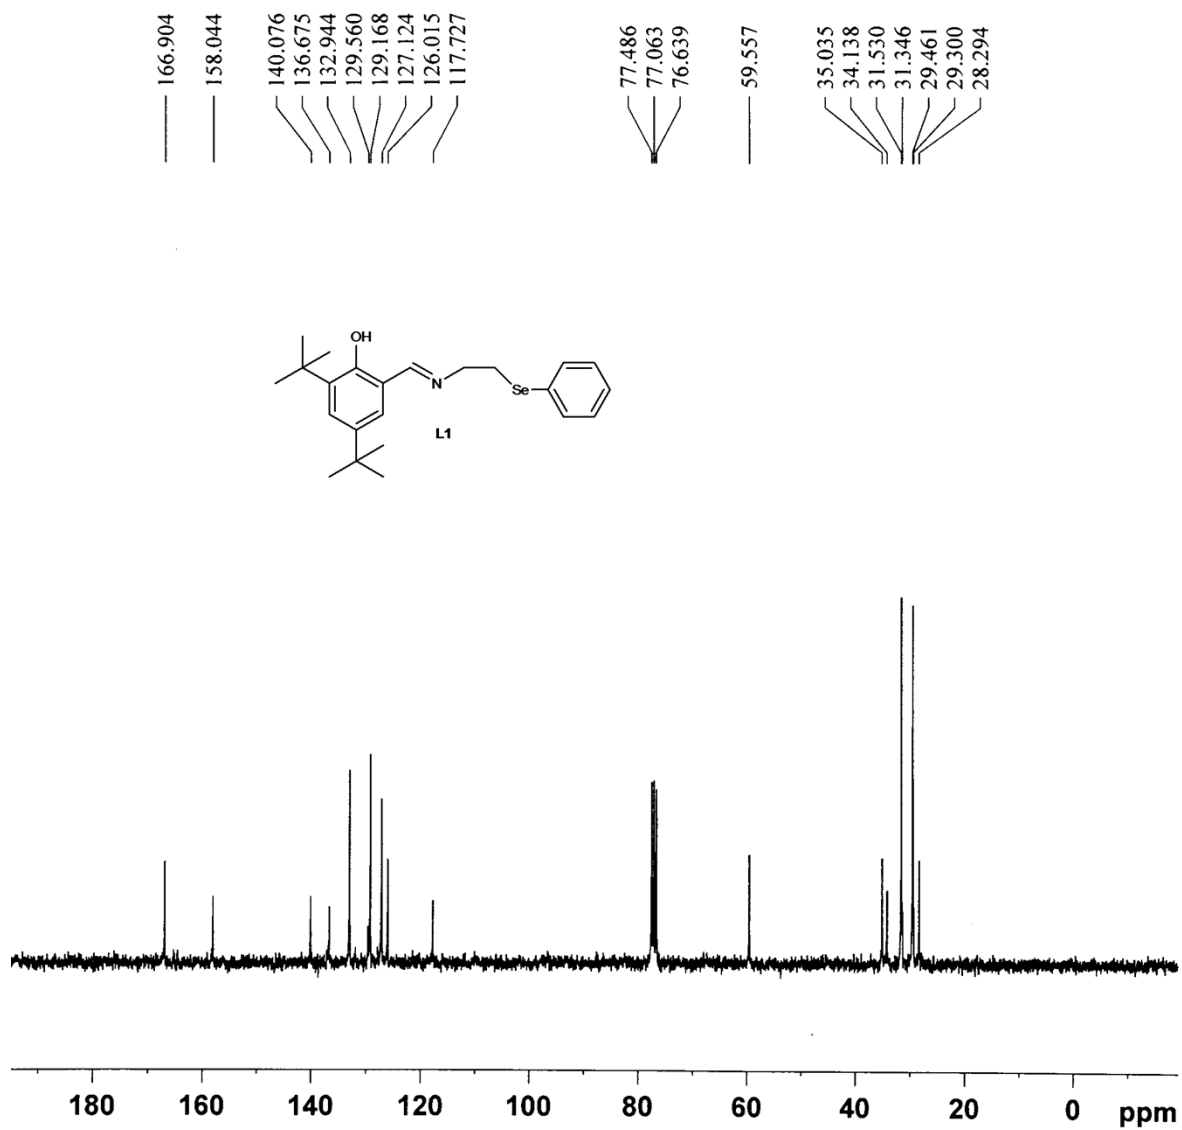

**Fig. S2**  $^{13}\text{C}\{^1\text{H}\}$  NMR (75.47 MHz) spectrum of L1.

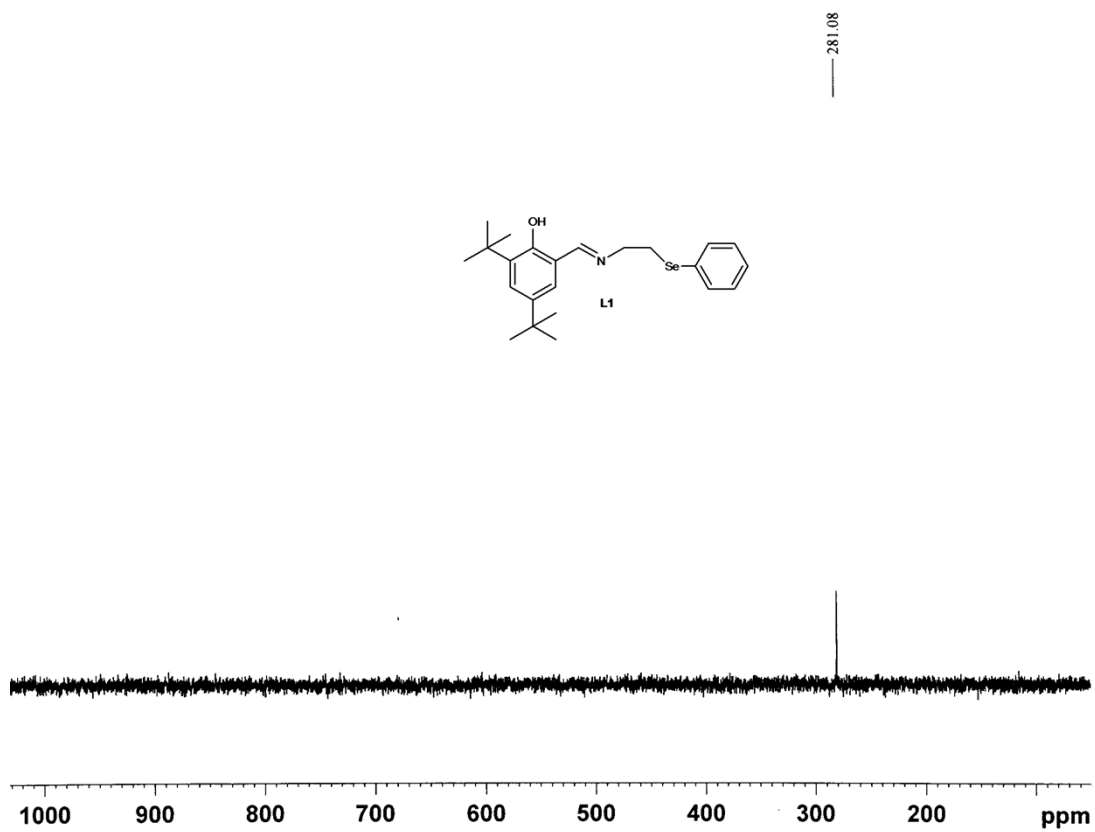

**Fig. S3**  $^{77}\text{Se}\{^1\text{H}\}$  NMR (57.24 MHz) spectrum of L1.

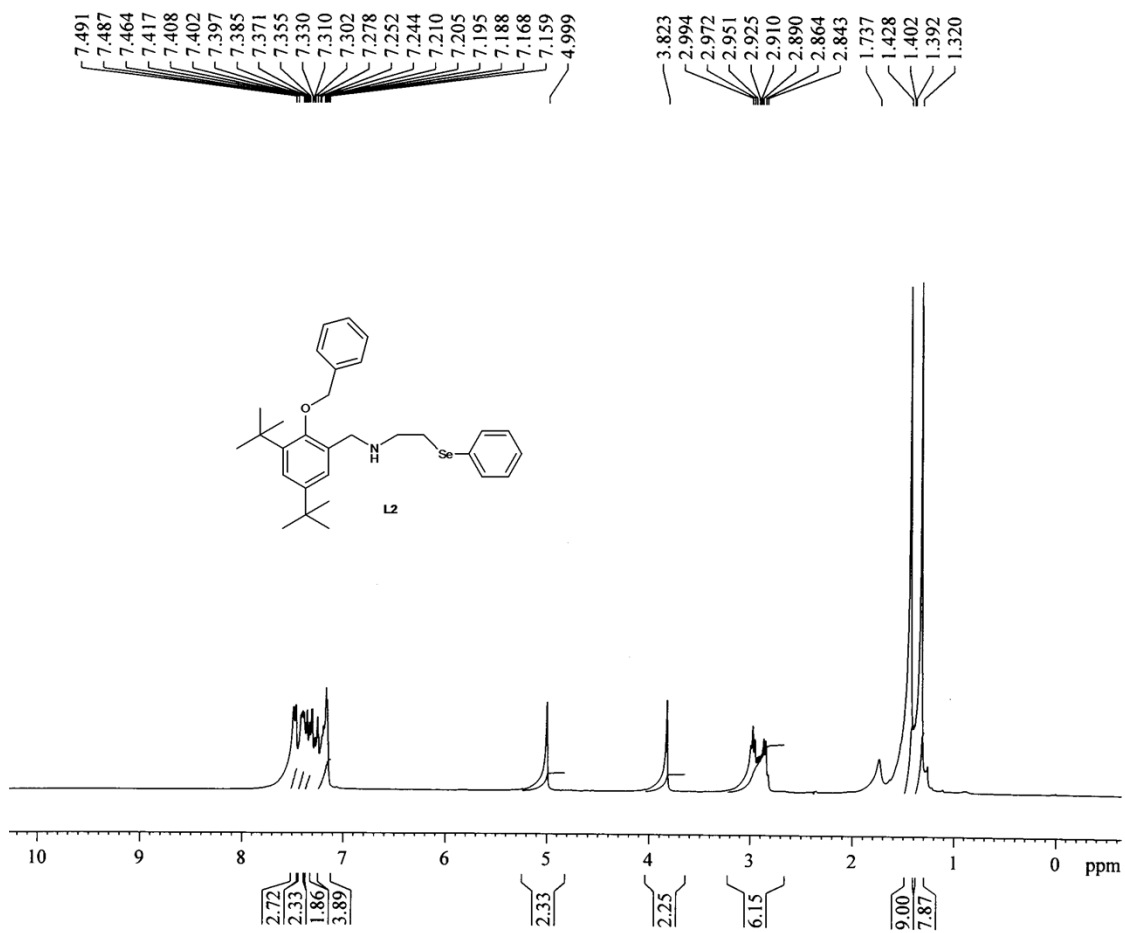

Fig. S4 <sup>1</sup>H NMR (300.13 MHz) spectrum of L2.

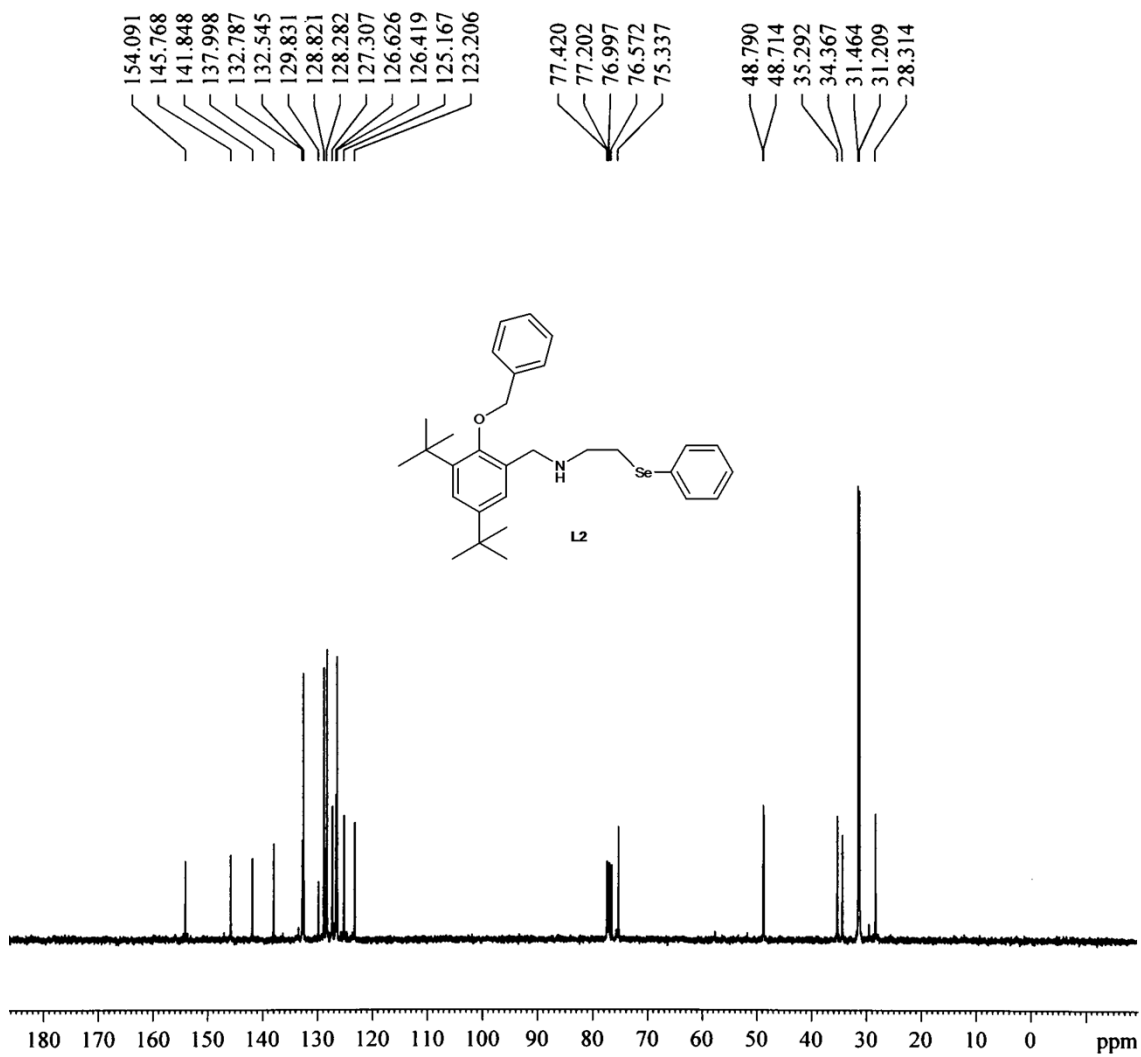

**Fig. S5**  $^{13}\text{C}\{^1\text{H}\}$  NMR (75.47 MHz) spectrum of **L2**.

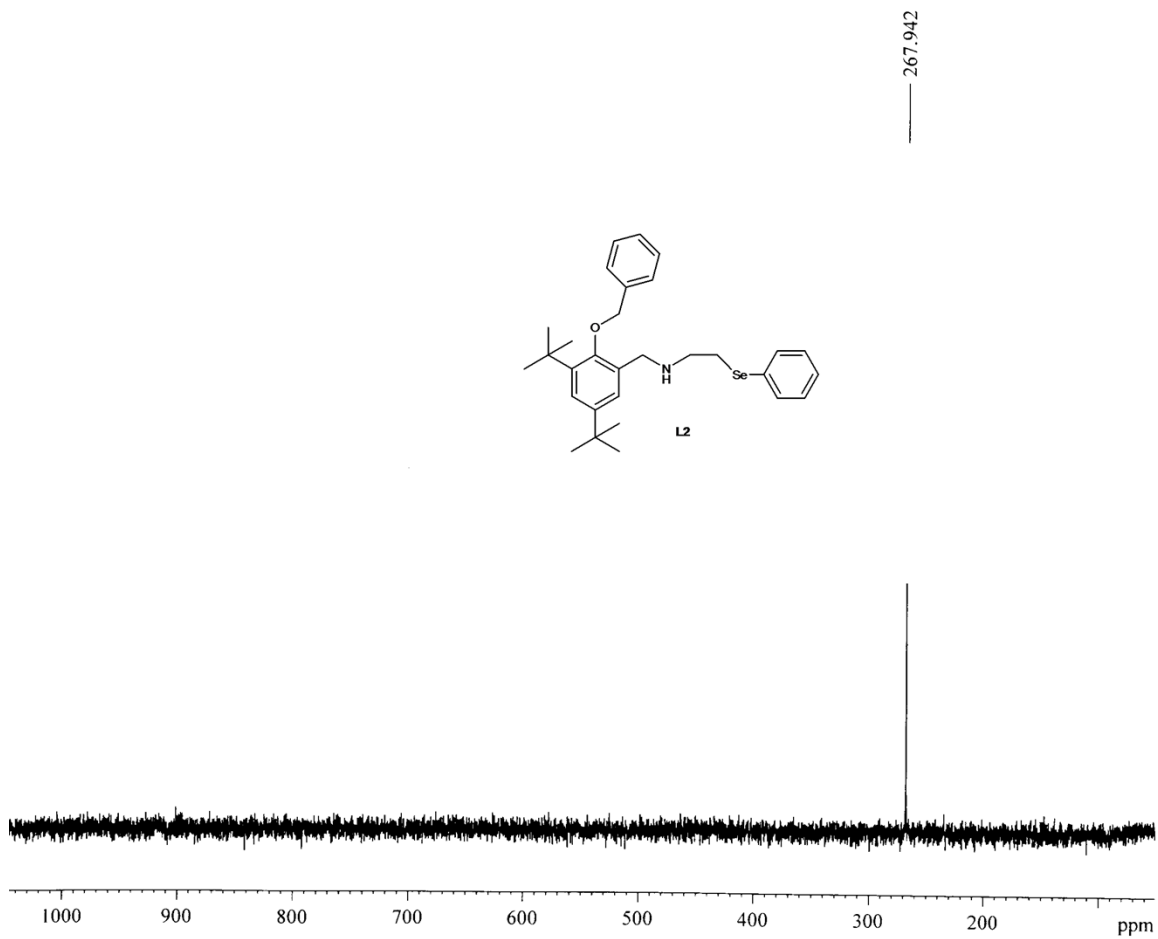

**Fig. S6**  $^{77}\text{Se}\{^1\text{H}\}$  NMR (57.24 MHz) spectrum of **L2**.

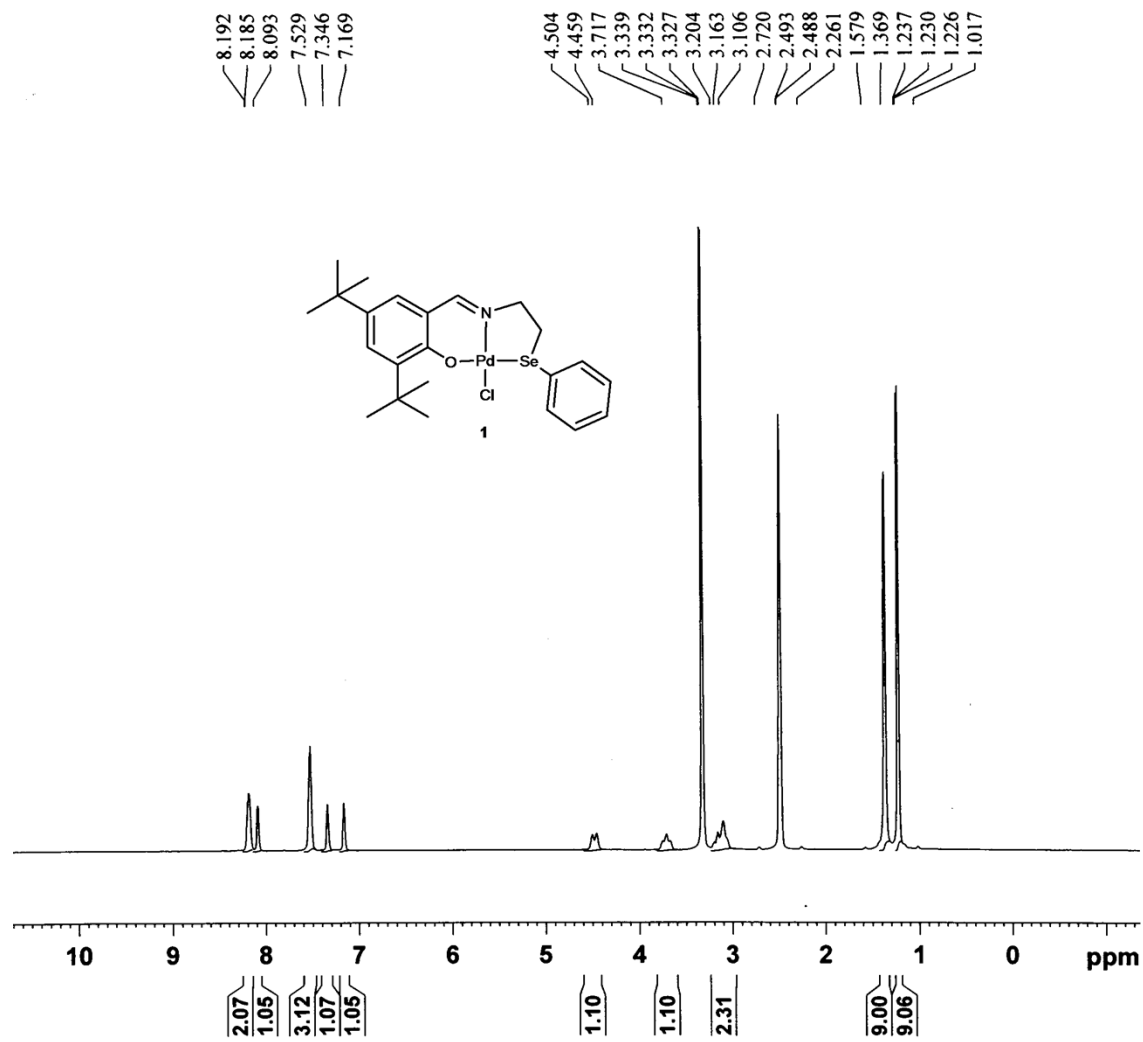

**Fig. S7**  $^1\text{H}$  NMR (300.13 MHz) spectrum of **1**.



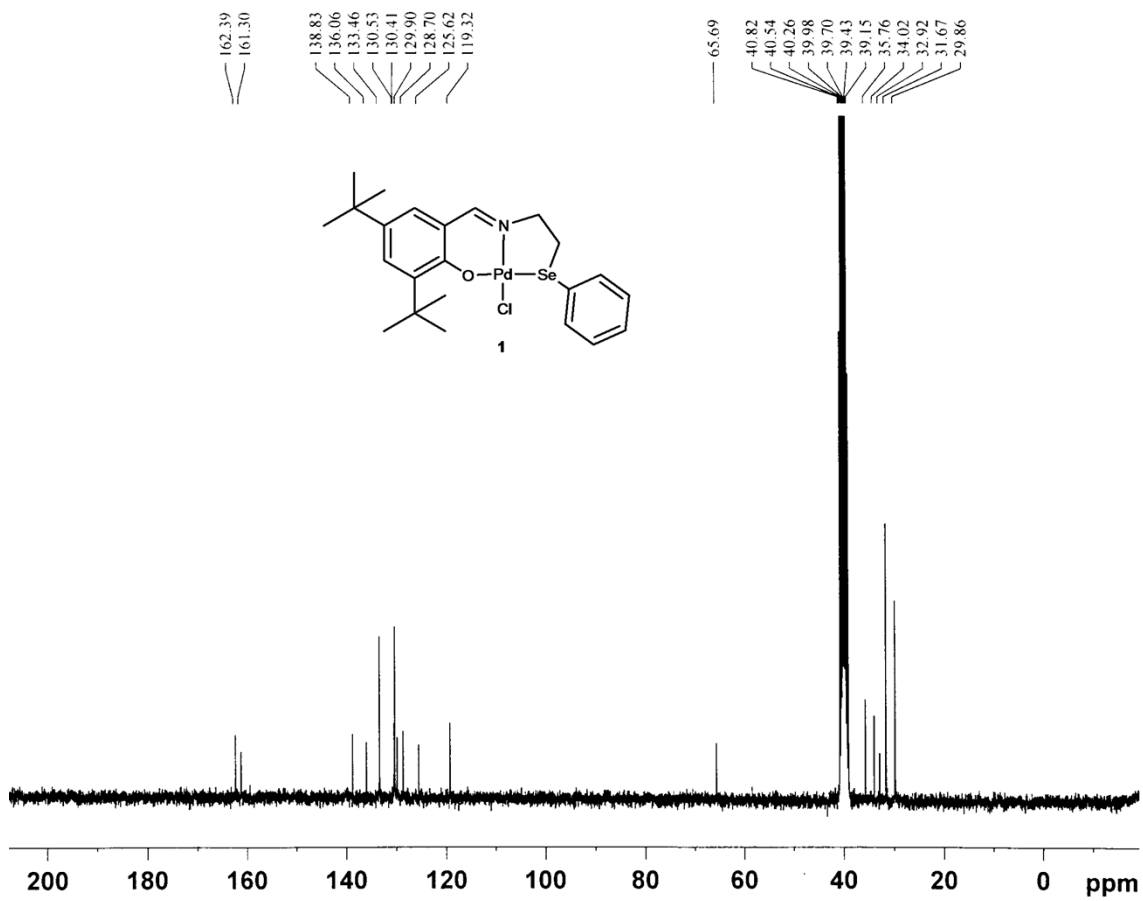

**Fig. S8**  $^{13}\text{C}\{^1\text{H}\}$  NMR (75.47 MHz) spectrum of **1**.

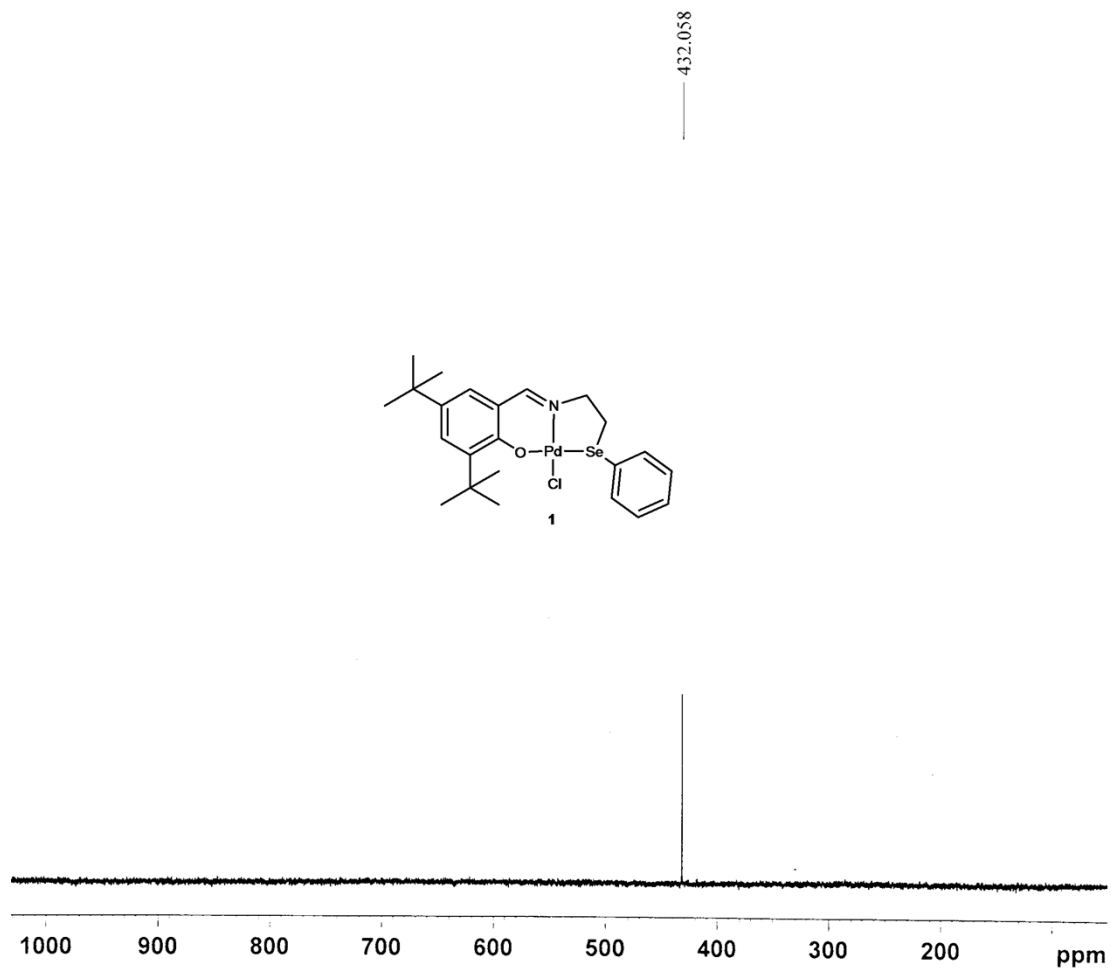

**Fig. S9**  $^{77}\text{Se}\{^1\text{H}\}$  NMR (57.24 MHz) spectrum of **1**.

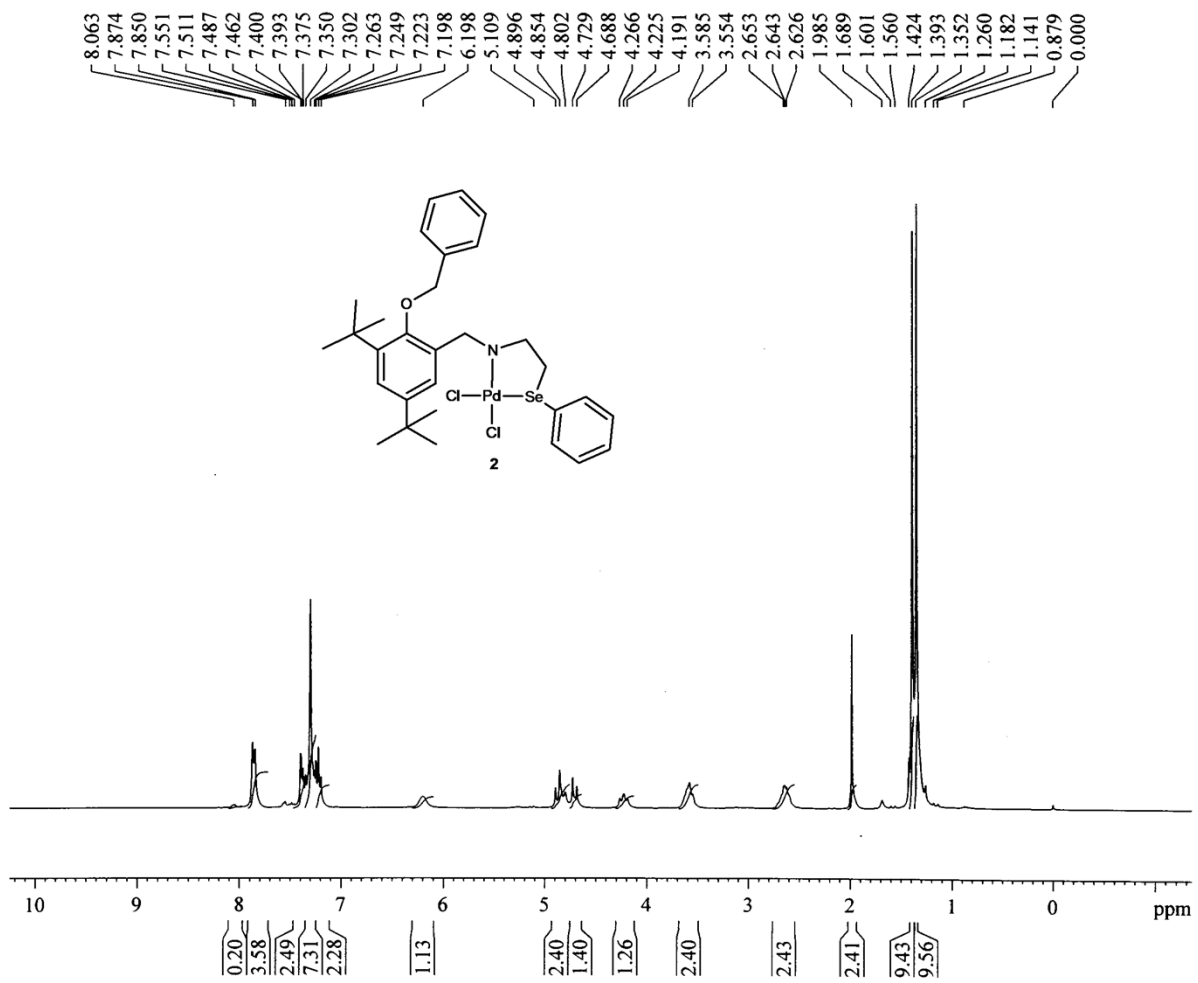

Fig. S10 <sup>1</sup>H NMR (300.13 MHz) spectrum of **2**.

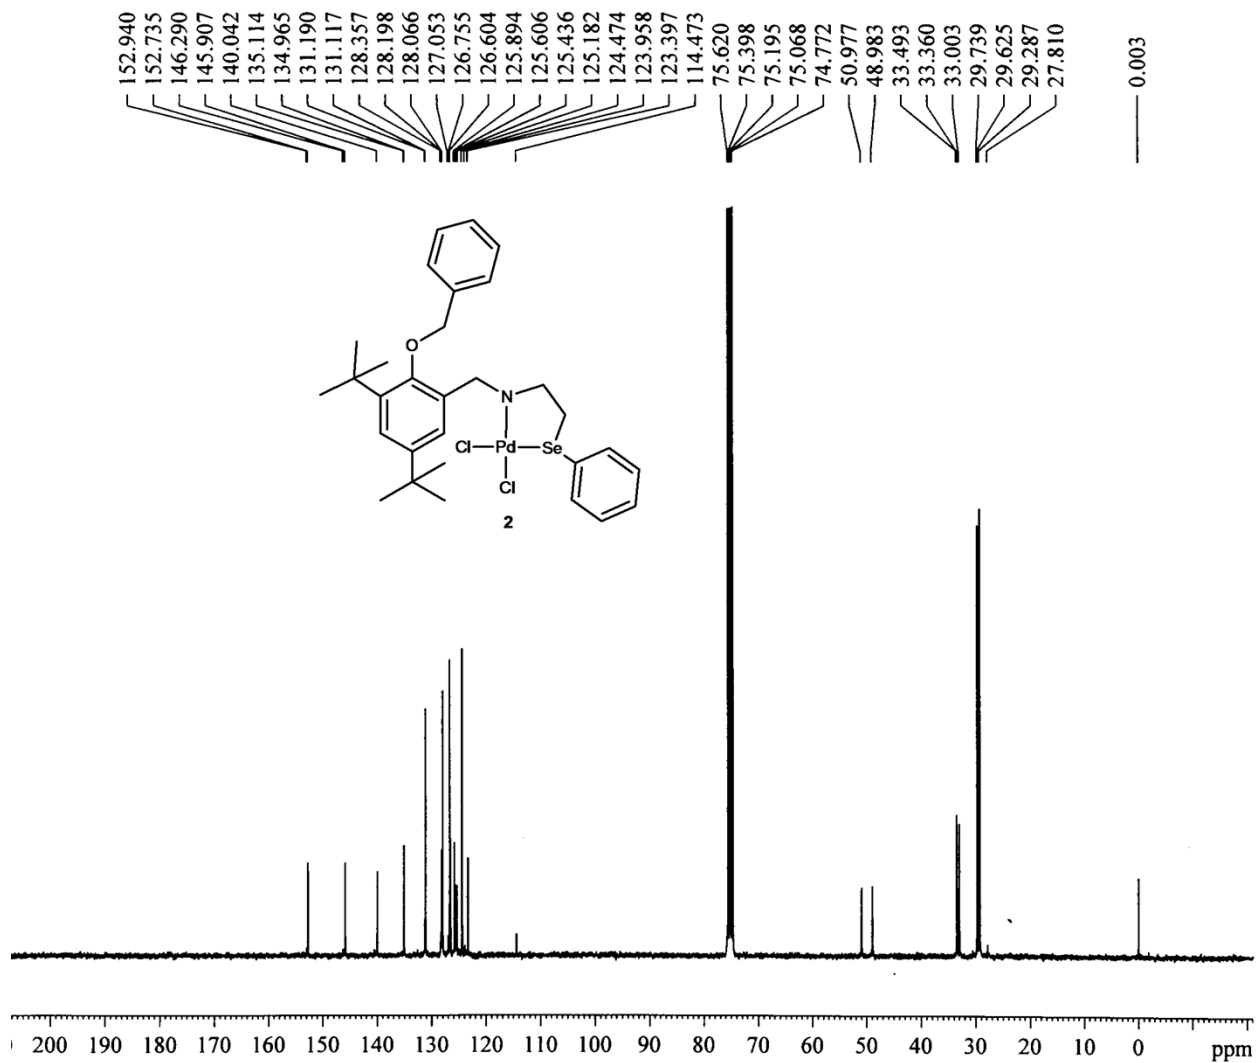

**Fig. S11** <sup>13</sup>C{<sup>1</sup>H} NMR (75.47 MHz) spectrum of 2.

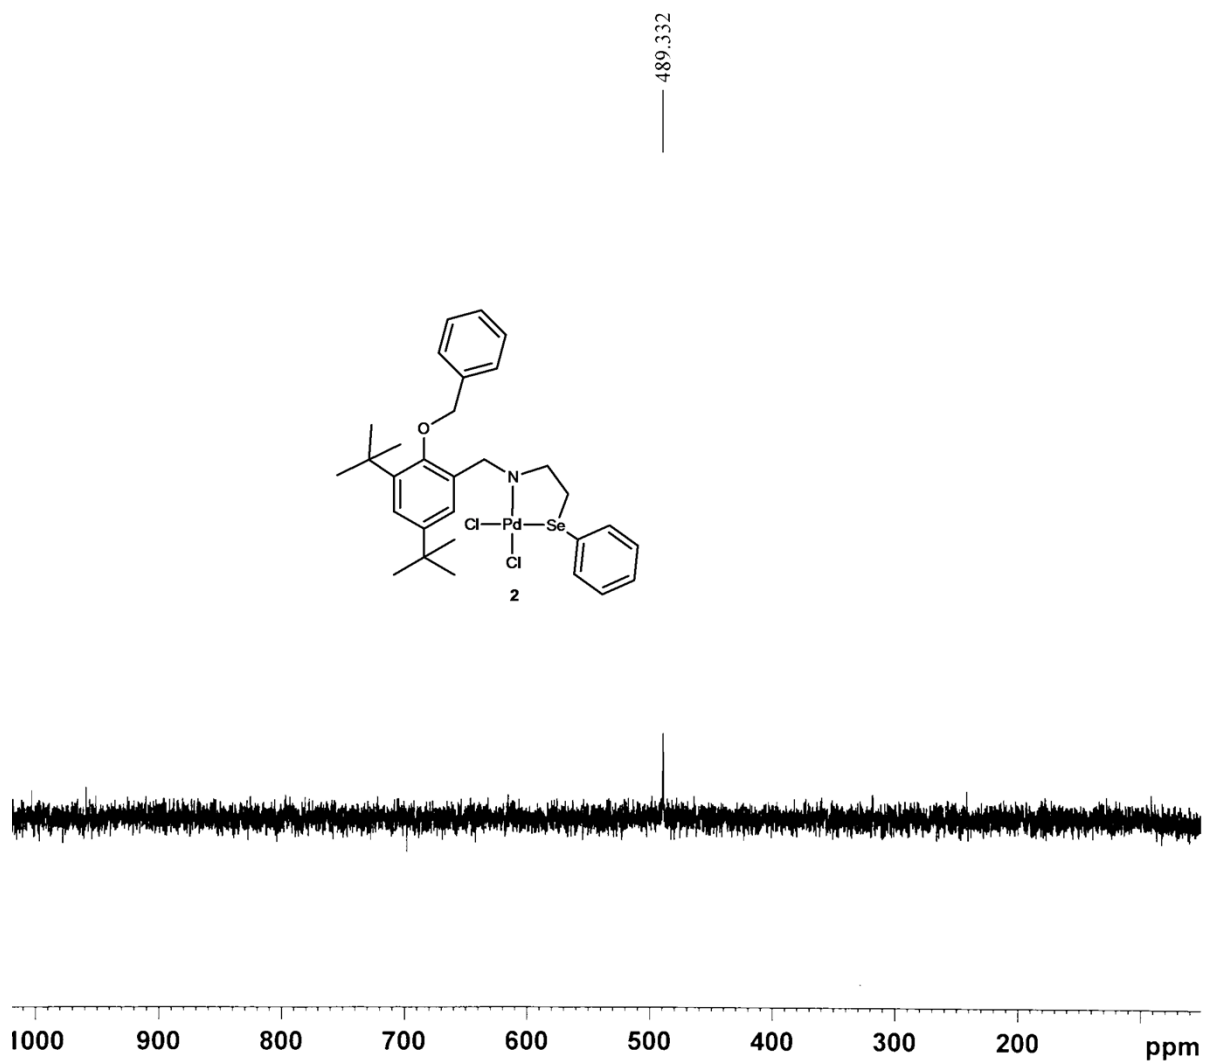

**Fig. S12**  $^{77}\text{Se}\{^1\text{H}\}$  NMR (57.24 MHz) spectrum of **2**.
